# Supplementary material
Source: publisher figshare collection journal article supplement (https://frontiersin.figshare.com/ndownloader/files/34395611)
Supplement: Supplementary file [file 34395611]

# Supplement C – Inter-observer reliability

## 1 Introduction

The work presented in the main manuscript is part of a larger programme of welfare research. As such, the two assessors had performed a number of QBAs together and these assessments were used to calculate the inter-rate reliability (IRR) of the assessors.

## 2 Methods

A total of 44 QBAs were conducted, spanning 22 events, which each assessor conducting a QBA on each event. These assessments took place under the same conditions as QBA in the primary study. Principal component analysis (PCA) was conducted on the resulting scores and Kendall's coefficient of concordance was applied. Test statistics (*W*-values) were interpreted as per Bateson and Martin (2021):

- 0.0-0.2 – slight agreement
- 0.2-0.4 – low agreement
- 0.4-0.7 – moderate agreement
- 0.7-0.9 – high agreement
- 0.9-1.0 – very high agreement

## 3 Results

There was a high and statistically significant level of agreement between assessors across PC1, PC2, and PC3.

Table 1 – Summary PCA results showing the % of variance explained by each component. Additionally, the *W*-value and *p*-value, for each PC, from Kendall's coefficient of concordance testing.

|                 | PC1    | PC2    | PC3    |
|-----------------|--------|--------|--------|
| % of variance   | 30.5   | 17.6   | 12.1   |
| <i>W</i> -value | 0.871  | 0.828  | 0.779  |
| <i>p</i> -value | 0.0189 | 0.0299 | 0.0493 |

## 4 References

Bateson, M., Martin, P., 2021. Measuring Behaviour: An Introductory Guide. Cambridge University Press.
